# Supplementary material
Source: HighWire-hosted journal article supplement (http://www.cmaj.ca/highwire/filestream/58298/field_highwire_adjunct_files/1/resp-falagas-2-at.pdf)
Supplement: resp-falagas-2-at.pdf [file resp-falagas-2-at.pdf]

**Appendix 2:** Characteristics of randomized controlled trials included in the meta-analysis of the effectiveness of fluoroquinolones compared with other antibiotics for the treatment of community-acquired pneumonia (part 1 of 4)

| Study                        | Population                                                        | Mean or median age,* men, %                 | Quinolone regimen                     | Comparator regimen                                                                                                                                         | Additional antibiotics allowed                                                                            | Resistance at baseline ( <i>S. pneumoniae</i> )†                                                                                 |
|------------------------------|-------------------------------------------------------------------|---------------------------------------------|---------------------------------------|------------------------------------------------------------------------------------------------------------------------------------------------------------|-----------------------------------------------------------------------------------------------------------|----------------------------------------------------------------------------------------------------------------------------------|
| Carbon et al <sup>1</sup>    | In- and outpatient adults ≥18 yr (mild to moderate CAP)           | 41.2 ± 15.6<br>v. 40.9 ± 14.2,<br>58 v. 68  | PO levofloxacin 500 mg q24 h or q12 h | PO amoxicillin-clavulanate 625 mg q8 h                                                                                                                     | None                                                                                                      | levofloxacin: 1/156<br>amoxicillin-clav: 14/138                                                                                  |
| D'Ignazio et al <sup>2</sup> | Outpatient adults ≥18 yr (mild to moderate CAP)                   | 48.2 ± 18.1<br> v. 49.0 ± 18.6,<br>51 v. 57 | PO levofloxacin 500 mg q24 h          | PO azithromycin 2 gr (one dose formulation)                                                                                                                | None                                                                                                      | levofloxacin: 0/28,<br>azithromycin: 2/13<br>v. 5/15,<br>penicillin: 1/15 v.<br>1/13, (intermediate<br>4/15 v. 4/13)             |
| Erard et al <sup>3</sup>     | Inpatient adults ≥18 yr (moderate to severe CAP)                  | 77 (24–92)<br>v. 77 (26–95),<br>60 v. 68    | PO levofloxacin 500 mg q12 h          | IV ceftriaxone 2 gr q24 h with/without IV/PO clarithromycin 500 mg q12 h (followed mostly by PO β-lactams), (combination therapy 54% of patients)          | None                                                                                                      | levofloxacin: 0/11<br>v. 0/8, penicillin:<br>NA,<br>azithromycin: NA                                                             |
| File et al <sup>4</sup>      | In- (56%) and outpatient adults ≥18 yr (84% mild to moderate CAP) | 49.1 ± 17.6<br>v. 50.1 ± 18.5,<br>55 v. 54  | IV or PO levofloxacin 500 mg q24 h    | IV ceftriaxone 1-2 gr q12-24h and/or PO cefuroxime 500 mg q12 h                                                                                            | IV/PO erythromycin 0.5-1 gr q6 h or PO doxycycline 100 mg q12 h for atypical pathogens (~20% of patients) | levofloxacin: 0/39<br>v. 0/40,<br>penicillin: 0/28 v.<br>0/40, (intermediate<br>resistance 6/28 in<br>the levofloxacin<br>group) |
| Finch et al <sup>5</sup>     | Inpatient adults ≥18 yr (moderate to severe CAP)                  | 55.2 ± 20.6<br>v. 55.9 ± 19.6,<br>NA        | IV to PO moxifloxacin 400 mg q24 h    | IV amoxicillin-clavulanate 1.2 gr q8 h followed by PO 625 mg q8 h with/without IV/PO clarithromycin 500 mg q12 h (combination therapy 60% of patients)     | None                                                                                                      | Moxifloxacin: 0/58,<br>clarithromycin: NA,<br>amoxicillin-clav:<br>NA<br>PRSP: 2 isolates,<br>PISP: 7 isolates                   |
| Fogarty et al <sup>6</sup>   | Inpatient adults ≥ 18 yr (moderate to severe CAP)                 | 61.6 ± 16.6<br>v. 59.8 ± 18.1,<br>65 v. 71  | IV to PO levofloxacin 500 mg q24 h    | IV/IM ceftriaxone 1-2 gr q24 h plus IV erythromycin 0.5-1 gr q6 h, followed by PO amoxicillin/clavulanate 875 mg q12 h plus PO clarithromycin 500 mg q12 h | None                                                                                                      | NA                                                                                                                               |
| Fogarty et al <sup>7</sup>   | Outpatient adults ≥18 yr (mild to moderate CAP)                   | 48 (18-88)<br>v. 49 (18-88),<br>40 v. 49    | PO moxifloxacin 400 mg q 24 h         | PO clarithromycin 500 mg q12 h                                                                                                                             | None                                                                                                      | PRSP: 3 isolates,<br>treatment group<br>not defined                                                                              |

Continued

**Appendix 2:** Characteristics of randomized controlled trials included in the meta-analysis of the effectiveness of fluoroquinolones compared with other antibiotics for the treatment of community-acquired pneumonia (part 2 of 4)

| Study                             | Population                                                    | Mean or median age,* men, %                               | Quinolone regimen                      | Comparator regimen                                                                                                                                                                 | Additional antibiotics allowed  | Resistance at baseline ( <i>S. pneumoniae</i> )†                 |
|-----------------------------------|---------------------------------------------------------------|-----------------------------------------------------------|----------------------------------------|------------------------------------------------------------------------------------------------------------------------------------------------------------------------------------|---------------------------------|------------------------------------------------------------------|
| Frank et al <sup>9</sup>          | Inpatient adults ≥18 yr (moderate to severe CAP)              | 67.8 ± 13.1 v. 67.3 ± 13.2<br>66 v. 77                    | IV to PO levofloxacin 500 mg q24 h     | IV azithromycin 500 mg q24 h plus IV ceftriaxone 1 gr q24 h followed by optional PO azithromycin 500 mg q24 h                                                                      | None                            | levofloxacin: 0/104<br>azithromycin: 8/104<br>ceftriaxone: 1/104 |
| Geijo Martinez et al <sup>9</sup> | In- and outpatient adults ≥18 yr (59% moderate to severe CAP) | 71.8 v. 70, 80 v. 86                                      | IV to PO levofloxacin 500 mg q24 h     | IV ceftriaxone 1-3 gr q24 h or cefotaxime 1-2 gr q6-8 h or amoxicillin-clavulanate 2.2 gr q8 h with/without IV to PO azithromycin 500mg q24 h or clarithromycin 250-500mg q12 h    | None                            | NA                                                               |
| Gotfried et al <sup>10</sup>      | Outpatient adults ≥18 yr (mild to moderate CAP)               | 49.0 ± 16.2 v. 51.2 ± 16.5, 51 v. 59                      | PO levofloxacin 250 mg q12 d           | PO clarithromycin 500 mg q12 h                                                                                                                                                     | None                            | NA                                                               |
| Hoeffken et al <sup>11</sup>      | Outpatient adults ≥18 yr (mild to moderate CAP)               | 48.4 ± 20.6 v. 48.0 ± 20.8 v. 48.2 ± 19.2, 62 v. 61 v. 62 | PO moxifloxacin 200 mg or 400 mg q24 h | PO clarithromycin 500 mg q12 h                                                                                                                                                     | None                            | NA                                                               |
| Kalbermatter et al <sup>12</sup>  | Inpatient adults ≥18 yr (mild to moderate CAP)                | 60 ± 13.9 v. 56 ± 19.3 v. 65 ± 15.2, 46 v. 40 v. 57       | IV levofloxacin 500 mg q24 h           | IV amoxicillin-clavulanate 1.2 gr q8h or IV ceftriaxone 1gr q12 h                                                                                                                  | NA                              | NA                                                               |
| Katz et al <sup>13</sup>          | Inpatient adults ≥18 yr (76% mild to moderate CAP)            | 59.4 ± 19 v. 58.7 ± 20.5, 56 v. 56                        | IV moxifloxacin 400 mg q24 h           | IV ceftriaxone 2 gr q24 h followed by PO cefuroxime 500 mg q12 h with or without IV/PO azithromycin 500 mg q24 h followed by PO 250 mg q24 h (combination therapy 72% of patients) | IV/PO metronidazole 500 mg q6 h | moxifloxacin: 0/26<br>penicillin: 3/26                           |

Continued

**Appendix 2:** Characteristics of randomized controlled trials included in the meta-analysis of the effectiveness of fluoroquinolones compared with other antibiotics for the treatment of community-acquired pneumonia (part 3 of 4)

| Study                          | Population                                                        | Mean or median age,* men, %          | Quinolone regimen                  | Comparator regimen                                                                                                                 | Additional antibiotics allowed                                    | Resistance at baseline ( <i>S. pneumoniae</i> )†                                                    |
|--------------------------------|-------------------------------------------------------------------|--------------------------------------|------------------------------------|------------------------------------------------------------------------------------------------------------------------------------|-------------------------------------------------------------------|-----------------------------------------------------------------------------------------------------|
| Leophonte et al <sup>14</sup>  | Inpatient (94%) adults ≥18 yr (84% mild to moderate CAP)          | 53.3 ± 20.4 v. 55.3 ± 19.8, 64 v. 63 | PO gemifloxacin 320 mg q24 h       | PO amoxicillin-clavulanate 1000/125 mg q8 h                                                                                        | None                                                              | gemifloxacin: 0/69<br>macrolides: 16/69<br>Penicillin: 4/69<br>(9/69 intermediate resistance)       |
| Lin et al <sup>15</sup>        | Inpatient adults ≥18 yr (71% moderate to severe CAP)              | 65.3 ± 13.2 v. 71.0 ± 11.4, 65 v. 82 | IV to PO levofloxacin 500 mg q24 h | IV amoxicillin-clavulanate 600 mg q8 h followed by PO 375 mg q8 h plus IV to PO clarithromycin 500 mg q12 h                        | NA                                                                | NA                                                                                                  |
| Lode et al <sup>16</sup>       | Inpatient adults ≥18 yr (80% mild to moderate CAP)                | 59.5 ± 17.7 v. 58.2 ± 18.7, 51 v. 60 | PO gemifloxacin 320 mg q24 h       | IV ceftriaxone 2 gr q24h, followed by PO cefuroxime 500 mg q12 h with or without a macrolide (combination therapy 39% of patients) | Macrolides‡ based on the discretion of the investigator           | penicillin: 3/51                                                                                    |
| Norrby et al <sup>17</sup>     | Inpatient adults ≥18 yr (moderate to severe CAP)                  | 65 (18–94), 65 %                     | IV to PO levofloxacin 500 mg q12 h | IV ceftriaxone 2 gr q12 h                                                                                                          | NA                                                                | levofloxacin: 1/332<br>ceftriaxone: 17/330                                                          |
| Petitpretz et al <sup>18</sup> | In- (79%) and outpatient adults ≥18 yr (mild to moderate)         | 52.0 ± 20.5 v. 49.9 ± 20.6, 61 v. 63 | PO moxifloxacin 400 mg q24 h       | PO amoxicillin 1000 mg q8 h                                                                                                        | None                                                              | penicillin: 10/91 for all isolates (23/91 intermediate resistance)                                  |
| Portier et al <sup>19</sup>    | Inpatient adults ≥ 18 yr (mild to moderate CAP)                   | 59.3 ± 17.9 v. 62.4 ± 18.0, 70 v. 75 | PO moxifloxacin 400 mg q24 h       | PO amoxicillin-clavulanate 1000/125 mg q8 h plus PO roxithromycin 150 mg q12 h                                                     | None                                                              | moxifloxacin: 0/11 v. 0/14<br>amoxicillin/clav: 0/11 v. 0/14<br>roxithromycin: 11/35 for all groups |
| Torres et al <sup>20</sup>     | In- (5%) and outpatient adults ≥18 yr (83% mild to, moderate CAP) | 52.7 ± 18.7 v. 49.3 ± 18.7, 59 v. 55 | PO moxifloxacin 400 mg q24 h       | PO amoxicillin 1 gr q8 h and/or PO clarithromycin 500 mg q12 h (combination therapy 59% of patients)                               | None                                                              | NA                                                                                                  |
| Welte et al <sup>21</sup>      | Inpatient adults ≥18 yr (83% mild to moderate CAP)                | NA, 63 v. 55                         | IV moxifloxacin 400 mg q24 h       | IV ceftriaxone 2 gr q24h                                                                                                           | IV erythromycin 1 gr q6-8 h (combination therapy 38% of patients) | NA                                                                                                  |

Continued

**Appendix 2:** Characteristics of randomized controlled trials included in the meta-analysis of the effectiveness of fluoroquinolones compared with other antibiotics for the treatment of community-acquired pneumonia (part 4 of 4)

| Study                      | Population                                       | Mean or median age,* men, %          | Quinolone regimen                  | Comparator regimen                                                                                | Additional antibiotics allowed | Resistance at baseline ( <i>S. pneumoniae</i> )† |
|----------------------------|--------------------------------------------------|--------------------------------------|------------------------------------|---------------------------------------------------------------------------------------------------|--------------------------------|--------------------------------------------------|
| Xu et al <sup>22</sup>     | Inpatient adults ≥18 yr (mild to moderate CAP)   | NA, NA                               | IV moxifloxacin 400 mg q24 h       | IV azithromycin 500 mg q24 h plus IV cefoperazone 2 gr q12 h                                      | None                           | NA                                               |
| Zervos et al <sup>23</sup> | Inpatient adults ≥18 yr (moderate to severe CAP) | 72.5 ± 14.1 v. 70.8 ± 13.4, 58 v. 55 | IV to PO levofloxacin 500 mg q24 h | IV azithromycin 500mg q24 h plus IV ceftriaxone 1gr q24 h followed by PO azithromycin 500mg q24 h | None                           | NA                                               |

Note: CAP = community acquired pneumonia, IV = intravenous, PO = per os, q = every, PRSP = penicillin-resistant *S. pneumoniae*, PISP = penicillin-intermediate *S. pneumoniae*, NA = not available.

\*Mean age is given as mean ± standard deviation, and median age as median (range). When no comparative data were provided, the mean age of both groups is included in the table.

†Pathogens isolated from all groups of patients were tested for resistance against all (individual) study antibiotics. Susceptibility patterns are presented per antibiotic and then per group of patients. If no data are presented in the table for individual antibiotics, then there were no data available in the studies.

‡Macrolides include azithromycin, clarithromycin, roxithromycin, erythromycin and spiramycin.

**References:**

- Carbon C, Ariza H, Rabie WJ, et al. Comparative study of levofloxacin and amoxicillin/clavulanic acid in adults with mild-to-moderate community-acquired pneumonia. *Clin Microbiol Infect* 1999;5:724-32.
- D'Ignazio J, Camere MA, Lewis DE, et al. Novel, single-dose microsphere formulation of azithromycin versus 7-day levofloxacin therapy for treatment of mild to moderate community-acquired pneumonia in adults. *Antimicrob Agents Chemother* 2005;49:4035-41.
- Erard V, Lamy O, Bochud PY, et al. Full-course oral levofloxacin for treatment of hospitalized patients with community-acquired pneumonia. *Eur J Clin Microbiol Infect Dis* 2004;23:82-8.
- File TM Jr, Segreti J, Dunbar L, et al. A multicenter, randomized study comparing the efficacy and safety of intravenous and/or oral levofloxacin versus ceftriaxone and/or cefuroxime axetil in treatment of adults with community-acquired pneumonia. *Antimicrob Agents Chemother* 1997;41:1965-72.
- Finch R, Schurmann D, Collins O, et al. Randomized controlled trial of sequential intravenous (i.v.) and oral moxifloxacin compared with sequential i.v. and oral co-amoxiclav with or without clarithromycin in patients with community-acquired pneumonia requiring initial parenteral treatment. *Antimicrob Agents Chemother* 2002;46:1746-54.
- Fogarty C, Siami G, Kohler R, et al. Multicenter, open-label, randomized study to compare the safety and efficacy of levofloxacin versus ceftriaxone sodium and erythromycin followed by clarithromycin and amoxicillin-clavulanate in the treatment of serious community-acquired pneumonia in adults. *Clin Infect Dis* 2004;38(Suppl 1):S16-23.
- Fogarty C, Grossman C, Williams J, et al. Efficacy and safety of moxifloxacin vs clarithromycin for community-acquired pneumonia. *Infect Med* 1999;16:748-63.
- Frank E, Liu J, Kinasewitz G, et al. A multicenter, open-label, randomized comparison of levofloxacin and azithromycin plus ceftriaxone in hospitalized adults with moderate to severe community-acquired pneumonia. *Clin Ther* 2002;24:1292-308.
- Geijo Martinez MP, Diaz de Tuesta Chow-Quan AM, Herranz CR, et al. Levofloxacin versus beta-lactamic therapy in community acquired pneumonia that requires hospitalization. *Med Interna* 2002;19:621-5.
- Gotfried MH, Dattani D, Riffer E, et al. A controlled, double-blind, multicenter study comparing clarithromycin extended-release tablets and levofloxacin tablets in the treatment of community-acquired pneumonia. *Clin Ther* 2002;24:736-51.
- Hoeffken G, Meyer HP, Winter J, et al.; Community-acquired Pneumonia Study Group. The efficacy and safety of two oral moxifloxacin regimens compared to oral clarithromycin in the treatment of community-acquired pneumonia. *Respir Med* 2001;95:553-64.

12. Kalbermatter V, Bagilet D, Diab M, et al. Oral levofloxacin versus intravenous ceftriaxone and amoxicillin/clavulanic acid in the treatment of community-acquired pneumonia that requires hospitalization. *Med Clin (Barc)* 2000;115:561-3.
13. Katz E, Larsen LS, Fogarty CM, et al. Safety and efficacy of sequential i.v. to p.o. moxifloxacin versus conventional combination therapies for the treatment of community-acquired pneumonia in patients requiring initial i.v. therapy. *J Emerg Med* 2004;27:395-405.
14. Leophonte P, File T, Feldman C. Gemifloxacin once daily for 7 days compared to amoxicillin/clavulanic acid thrice daily for 10 days for the treatment of community-acquired pneumonia of suspected pneumococcal origin. *Respir Med* 2004;98:708-20.
15. Lin TY, Lin SM, Chen HC, et al. An open label randomized comparison of levofloxacin and amoxicillin/clavulanate plus clarithromycin for the treatment of hospitalized patients with community-acquired pneumonia. *Chang Gung Med J* 2007;30:321-32.
16. Lode H, File TM Jr, Mandell L, et al.; 185 Gemifloxacin Study Group. Oral gemifloxacin versus sequential therapy with intravenous ceftriaxone/oral cefuroxime with or without a macrolide in the treatment of patients hospitalized with community-acquired pneumonia: a randomized, open-label, multicenter study of clinical efficacy and tolerability. *Clin Ther* 2002;24:1915-36.
17. Norrby SR, Petermann W, Willcox PA, et al. A comparative study of levofloxacin and ceftriaxone in the treatment of hospitalized patients with pneumonia. *Scand J Infect Dis* 1998;30:397-404.
18. Petitpretz P, Arvis P, Marel M, et al.; CAP5 Moxifloxacin Study Group. Oral moxifloxacin vs high-dosage amoxicillin in the treatment of mild-to-moderate, community-acquired, suspected pneumococcal pneumonia in adults. *Chest* 2001;119:185-95.
19. Portier H, Brambilla C, Garre M, et al. Moxifloxacin monotherapy compared to amoxicillin-clavulanate plus roxithromycin for nonsevere community-acquired pneumonia in adults with risk factors. *Eur J Clin Microbiol Infect Dis* 2005;24:367-76.
20. Torres A, Muir JF, Corris P, et al. Effectiveness of oral moxifloxacin in standard first-line therapy in community-acquired pneumonia. *Eur Respir J* 2003;21:135-43.
21. Welte T, Petermann W, Schurmann D, et al.; MOXIRAPID Study Group. Treatment with sequential intravenous or oral moxifloxacin was associated with faster clinical improvement than was standard therapy for hospitalized patients with community-acquired pneumonia who received initial parenteral therapy. *Clin Infect Dis* 2005;41:1697-705.
22. Xu S, Xiong S, Xu Y, et al. Efficacy and safety of intravenous moxifloxacin versus cefoperazone with azithromycin in the treatment of community acquired pneumonia. *J Huazhong Univ Sci Technolog Med Sci* 2006;26:421-4.
23. Zervos M, Mandell LA, Vrooman PS, et al. Comparative efficacies and tolerabilities of intravenous azithromycin plus ceftriaxone and intravenous levofloxacin with step-down oral therapy for hospitalized patients with moderate to severe community-acquired pneumonia. *Tr*
